# Supplementary material
Source: Springer Nature journal article supplement (https://www.springermedizin.de/resource/supplementary/12913_2009_1156_MOESM1_ESM.pdf/9527882)
Supplement: MOESM1 [file 9527882]

Potentially relevant  
RCTs identified and  
screened for retrieval  
N=336

RCTs excluded N=310  
Population N=61  
Intervention N=230  
Outcome N=19

RCTs retrieved for more  
detailed evaluation.  
N=26

Excluded papers: N=18  
Design N= 7  
Intervention N= 11

Potentially appropriate RCTs  
to be included in the  
meta analysis N= 8

RCTs included in the  
meta-analysis  
N=8
